# Supplementary material
Source: publisher figshare collection journal article supplement (https://acs.figshare.com/ndownloader/files/9305053)
Supplement: Supplementary file 1 [file 9305053]

## Supporting Information

# Elaboration on the Distribution of Hydrophobic Segments in the Chains of Amphiphilic Cationic Polymers for siRNA Delivery

*Changrong Wang<sup>a, c, 1</sup>, Lili Du<sup>b, 1</sup>, Junhui Zhou<sup>a</sup>, Lingwei Meng<sup>b, e</sup>, Qiang Cheng<sup>b</sup>, Chun Wang<sup>a</sup>, Xiaoxia Wang<sup>b</sup>, Deyao Zhao<sup>b</sup>, Yuanyu Huang<sup>b, d</sup>, Shuquan Zheng<sup>b</sup>, Huiqing Cao<sup>b</sup>, Jianhua Zhang<sup>a</sup>, Liandong Deng<sup>a</sup>, Zicai Liang<sup>b, c\*</sup>, Anjie Dong<sup>a, c, \*</sup>*

<sup>a</sup> Department of Polymer Science and Technology, School of Chemical Engineering and Technology, Key Laboratory of Systems Bioengineering (Ministry of Education), Tianjin University, Tianjin 300072, China

<sup>b</sup> Laboratory of Nucleic Acid Technology, Institute of Molecular Medicine, Peking University, Beijing 100871, China

<sup>c</sup> Collaborative Innovation Center of Chemical Science and Engineering (Tianjin), Tianjin 300072, China

<sup>d</sup> Advanced Research Institute for Multidisciplinary Science, Beijing Institute of Technology, Beijing 100081, China

<sup>e</sup> Peking-Tsinghua Center for Life Science, Academy for Advanced Interdisciplinary Studies, Peking University, Beijing 100871, China

Corresponding Author: Zicai Liang, E-mail: [liangz@pku.edu.cn](mailto:liangz@pku.edu.cn); Anjie Dong, E-mail: [ajdong@tju.edu.cn](mailto:ajdong@tju.edu.cn).

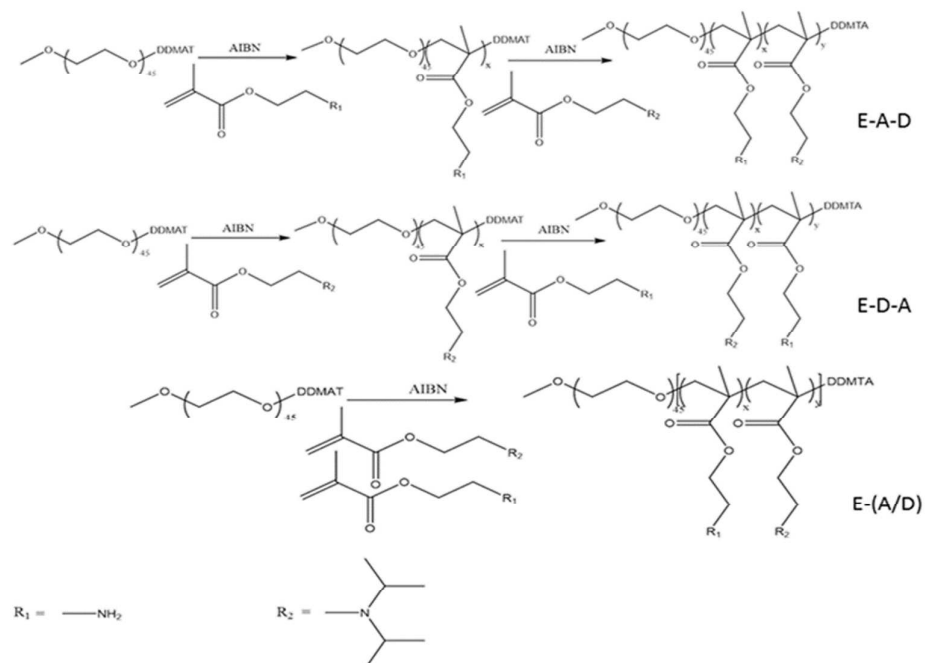

**Scheme S1.** The synthetic routes of E-A-D, E-D-A and E-(A/D).

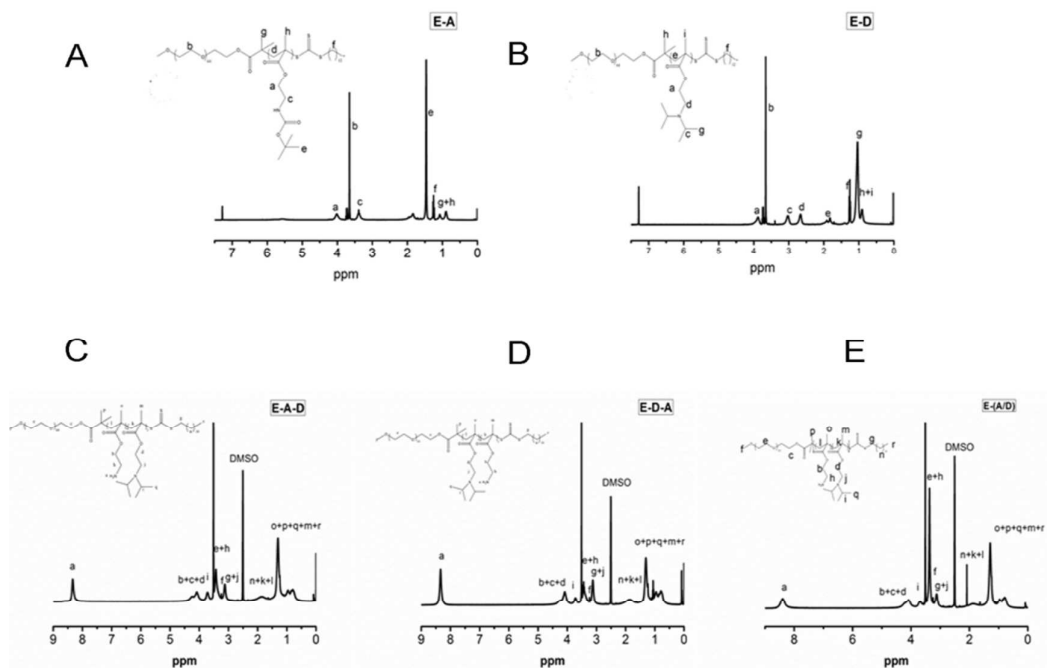

**Figure S1.**  $^1H$ -NMR spectroscopies of E-A, E-D, E-A-D, E-D-A and E-(A/D).

**Table S1.** The molecular structure, molecular weight and PDI of three polymers.

| Sample  | The molecular structure of the polymer <sup>a</sup>       | $M_n^b$ ( $10^4$ g/mol) | PDI <sup>c</sup> |
|---------|-----------------------------------------------------------|-------------------------|------------------|
| E-A-D   | PEG <sub>45</sub> -PAM <sub>46</sub> -PDP <sub>45</sub>   | 2.21                    | 1.67             |
| E-D-A   | PEG <sub>45</sub> -PDP <sub>45</sub> -PAM <sub>44</sub>   | 2.17                    | 1.68             |
| E-(A/D) | PEG <sub>45</sub> -P(AM <sub>42</sub> /DP <sub>42</sub> ) | 2.06                    | 1.57             |

<sup>a</sup> The molecular structure of the polymer was determined by <sup>1</sup>H NMR.

<sup>b</sup> The mean molecular weight ( $M_n$ ) of copolymers was estimated by <sup>1</sup>H NMR.

<sup>c</sup> PDI= $M_w/M_n$  measured by GPC.

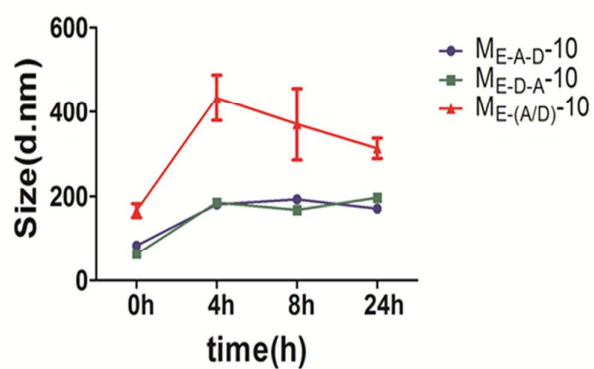

**Figure S2.** The stability of siRNA-loaded micelles at N/P=10 in PBS.

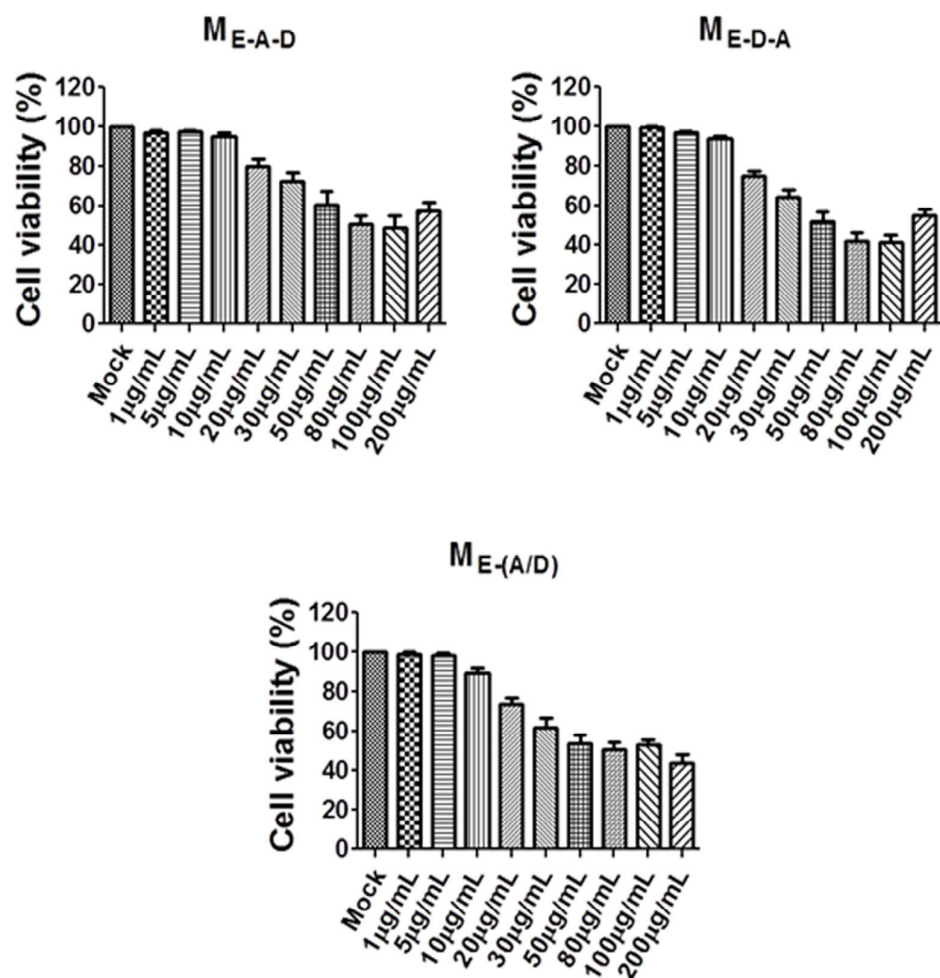

**Figure S3.** Cell cytotoxicity of M<sub>E-A-D</sub>, M<sub>E-D-A</sub> and M<sub>E-(A/D)</sub> at different concentrations.

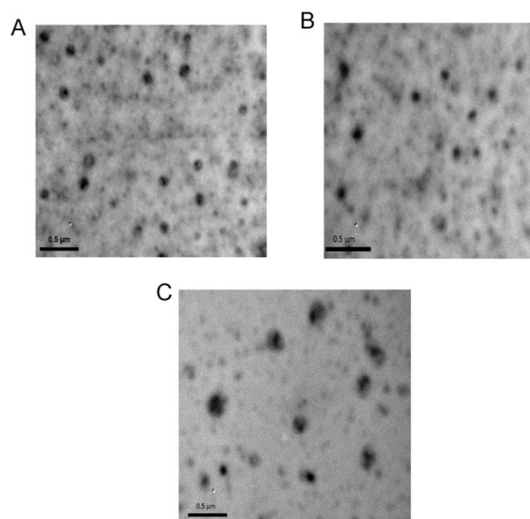

**Figure S4.** TEM images of M<sub>E-A-D</sub> (A), M<sub>E-D-A</sub> (B) and M<sub>E-(A/D)</sub> (C).

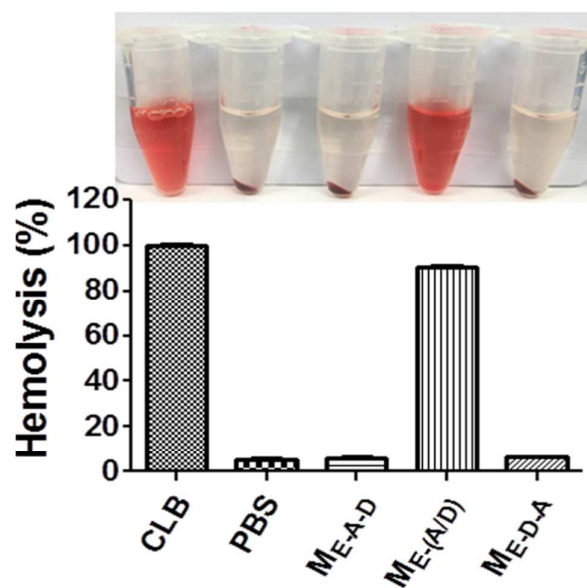

**Figure S5.** Hemolysis assay of 5 mM micelles in 1 mL PBS at pH=7.4. Cell lysis buffer was used as positive control and PBS was used as negative control.

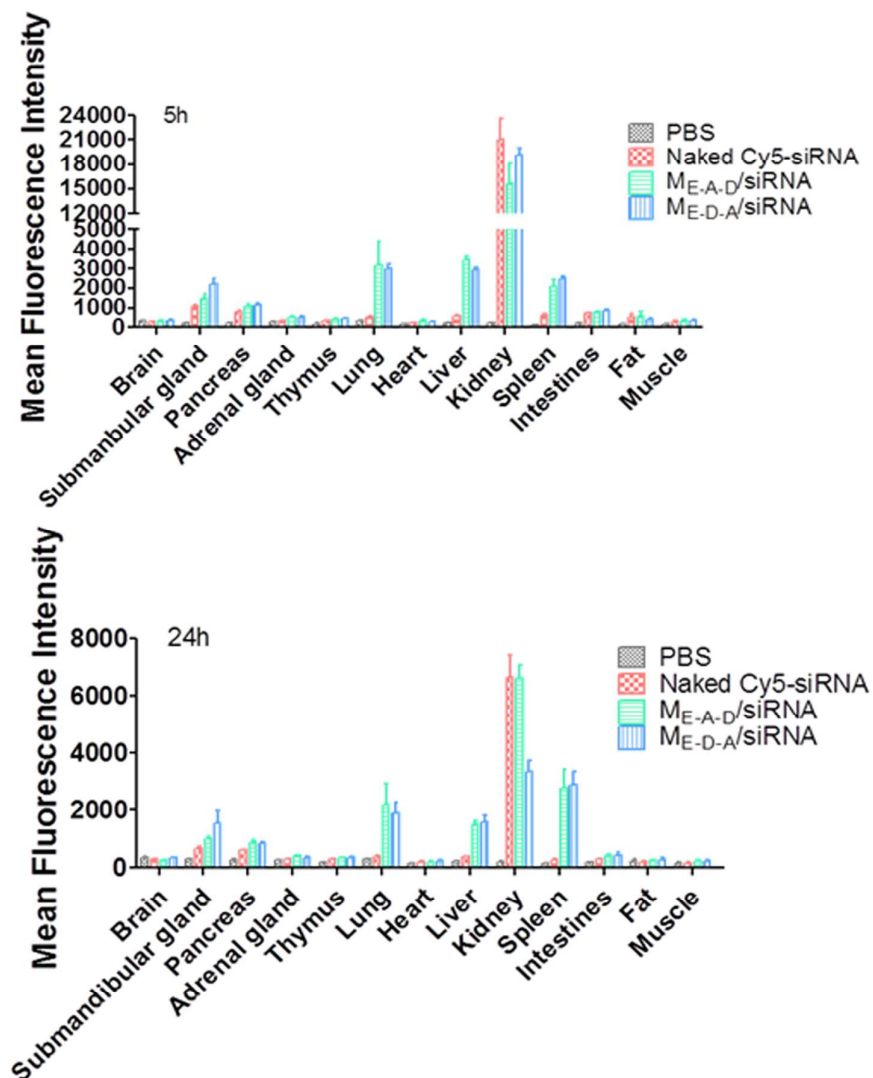

**Figure S6.** Quantitative analysis of different organs using a molecular imaging software package at 5 h and 24 h. Data were normalized to corresponding tissues from saline-treated animals. Each bar represents the mean±S.E. of three different experiments.

**Table S2.** The sequences of the siRNA used in this work.

| siRNA Name | Sequences                                      |
|------------|------------------------------------------------|
| Cy5-siRNA  | sense: 5'-Cy5-CCUUGAGGCAUACUUCAAAdTdT-3'       |
|            | anti-sense: 5'-UUUGAAGUAUGCCUCAAGGdTdT-3'      |
| siFL       | sense: 5'-CCCUAUUCUCCUUCUUCGCdTdT-3'           |
|            | anti-sense: 5'-GCGAAGAAGGAGAAUAGGGdTdT-3'      |
| siApoB     | sense: 5'-GUCAUCACACUGAAUACCAAUdTdT-3'         |
|            | anti-sense: 5'-AUUGGUAAUUCAGUGUGAUGACACdTdT-3' |
| siPLK1     | sense: 5'-UGAAGAAGAUACCCUCCUAdTdT-3'           |
|            | anti-sense: 5'-UAAGGAGGGUGAUCUUCUUCAdTdT-3'    |
| siRRM2     | sense: 5'-GCGAUUUAGCCAAGAAGUUCA-3'             |
|            | anti-sense: 5'-UAGCGACUAAACACAUCAAUU-3'        |
